# Supplementary material for: Twin boundaries induced by high-temperature shock boost the structural stability of Li-rich layered-oxide
Source: Royal Society of Chemistry journal article supplement (doi:10.1039/d4ta03098b), 2024-01-01
Supplement: d4ta03098b1.pdf [file d4ta03098b1.pdf]

## Supporting Information

### Twin Boundary Induced by High Temperature Shock Boosts Li-rich Layered-oxide Structural Stability

Zhedong Liu,<sup>1</sup> Cuihua Zeng,<sup>1</sup> Jingchao Zhang,<sup>1</sup> Jiawei Luo,<sup>1</sup> Zhaoxin Guo,<sup>1</sup> Zekun  
Li,<sup>1</sup> Rui Liu,<sup>2</sup> Wei-Di Liu,<sup>3</sup> Jia Ding,<sup>1</sup> Yanan Chen<sup>1,\*</sup> Wenbin Hu,<sup>1,\*</sup>

<sup>1</sup>School of Materials Science and Engineering, Tianjin University, Tianjin 300072, China

<sup>2</sup>School of Materials Science and Engineering, Shandong University of Science and Technology,  
Qingdao 266590, China

<sup>3</sup>School of Chemistry and Physic, ARC Research Hub in Zero-emission Power Generation for  
Carbon Neutrality, and Center for Materials Science, Queensland University of Technology,  
Brisbane, QLD 4000, Australia.

Email: [yananchen@tju.edu.cn](mailto:yananchen@tju.edu.cn); [wbhu@tju.edu.cn](mailto:wbhu@tju.edu.cn).

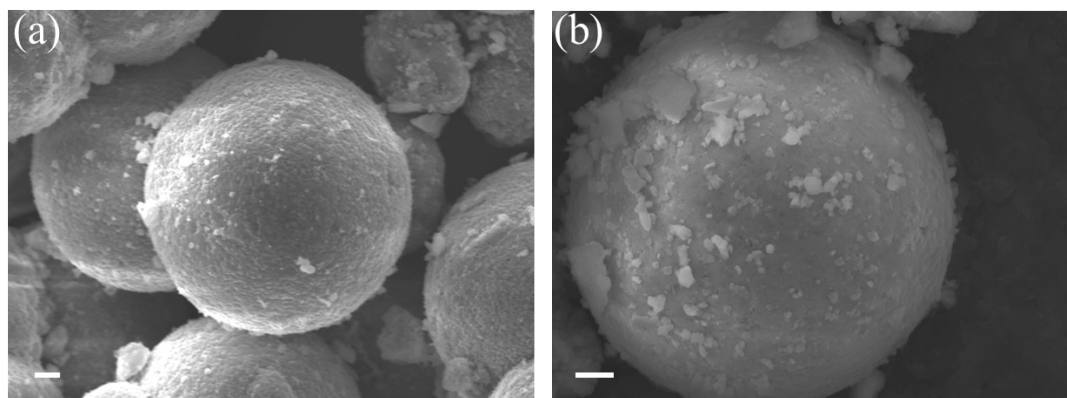

**Figure S1.** SEM images. a) LRO-TB. b) LRO, scale bar, 1  $\mu\text{m}$ .

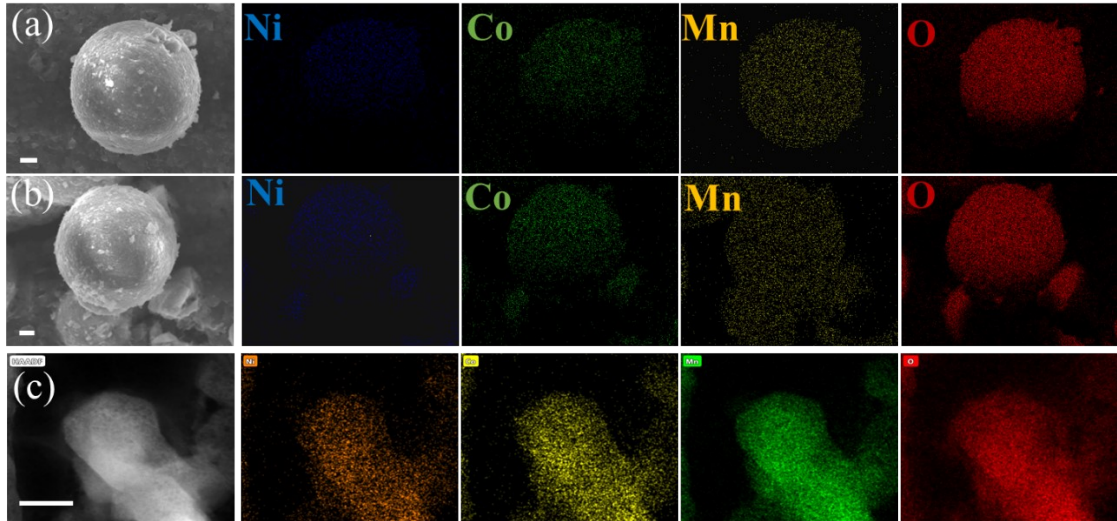

**Figure S2.** Elemental mappings. a) LRO-TB. b) LRO, scale bar, 1  $\mu\text{m}$ . c) primary particle of LRO-TB after FIB, scale bar, 50 nm.

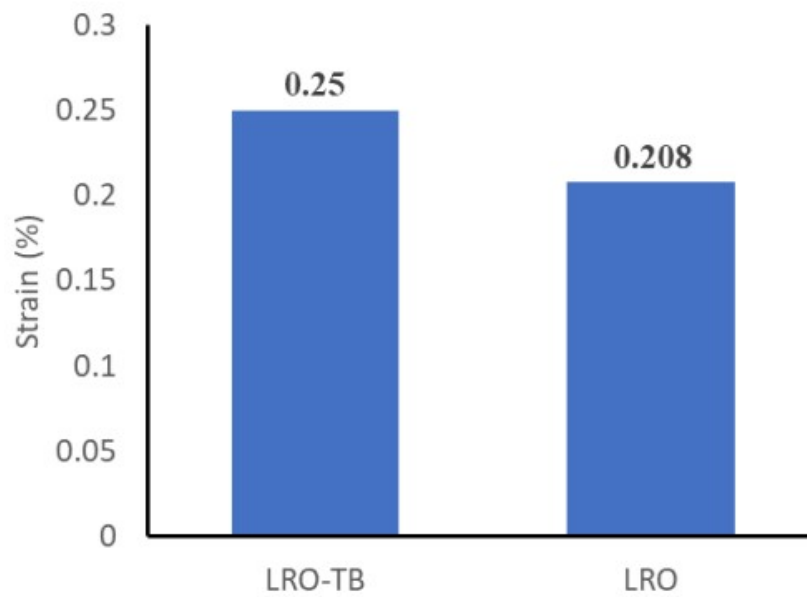

**Figure S3.** Strains exhibited in forms of histograms of LRO-TB and LRO.

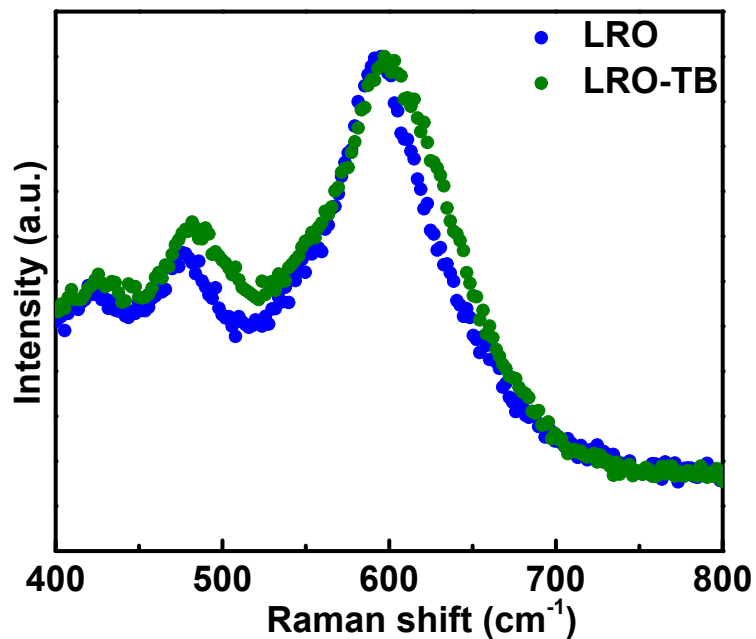

Figure S4. Raman spectrum of LRO-TB and LRO.

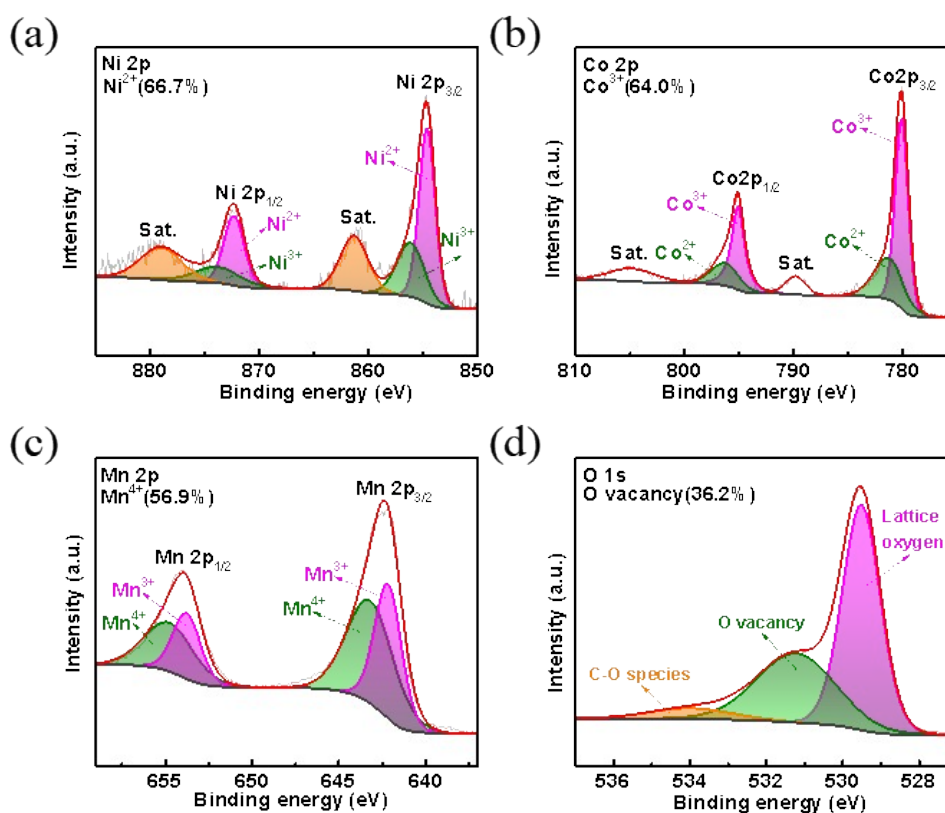

Figure S5. XPS spectra of Ni 2p, Co 2p, Mn 2p and O 1s of LRO.

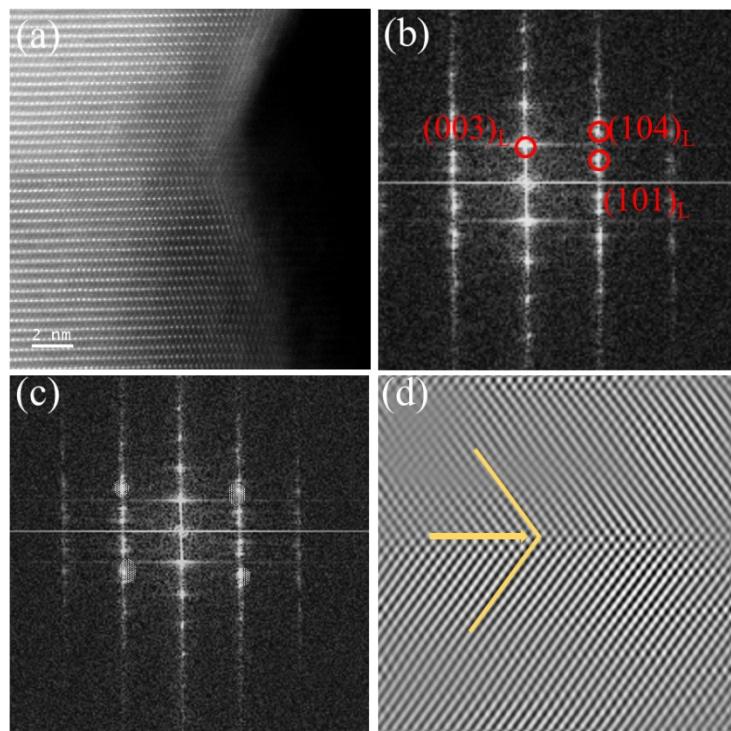

**Figure S6.** Structural characterizations of LRO-TB. a) HAADF STEM. b-c) FFT patterns. d) IFFT pattern corresponding to the two groups of white points in c).

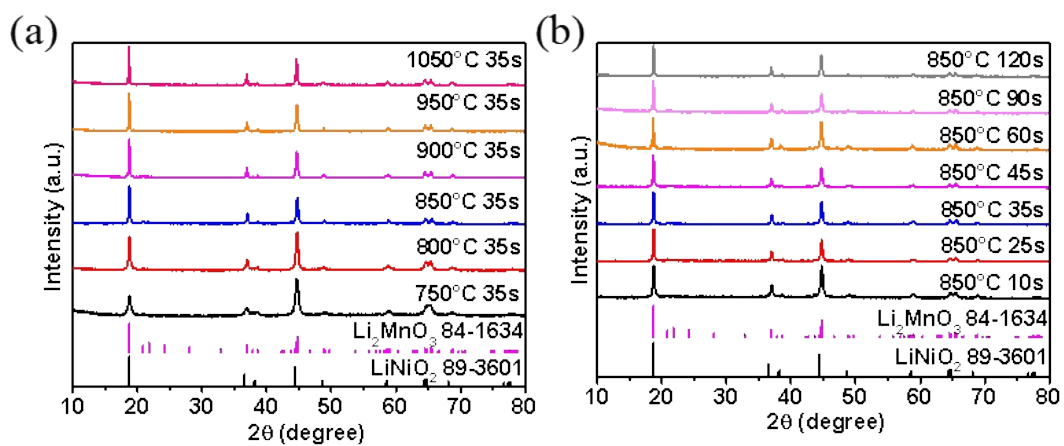

**Figure S7.** XRD patterns of samples obtained by changing calcination temperature and time using HTS. a) Calcination at different temperatures for 35 s. b) Calcination for different times at 850°C.

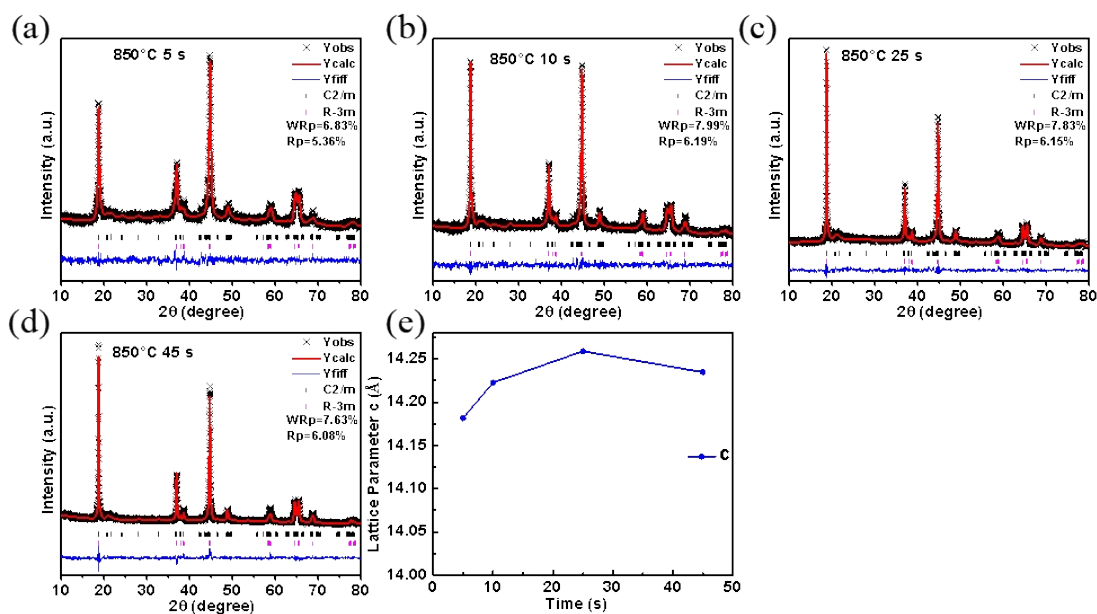

**Figure S8.** XRD refinement patterns calculated for different times at 850°C. a) 5 s. b) 10 s. c) 25 s. d) 45 s. e) Change curve of lattice parameters with calcination time.

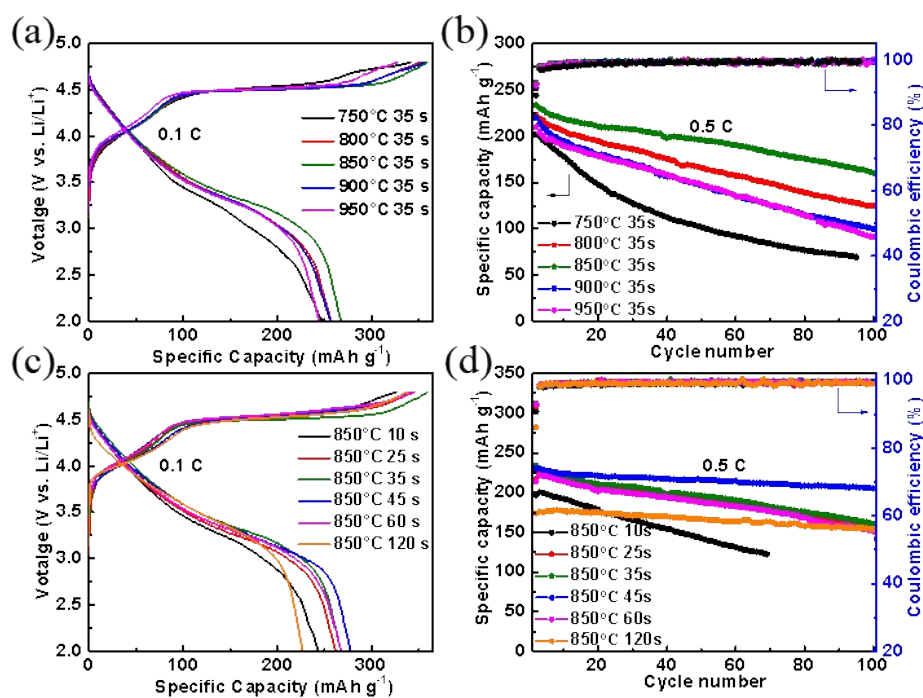

**Figure S9.** Electrochemical performances of HTS samples. a) Initial charge-discharge profiles of samples calcinated at different temperatures for 35 s at 0.1 C. b) Cycling performance of samples calcinated at different temperatures for 35 s at 0.5 C. c) Initial charge-discharge profiles of samples calcinated at 850 °C for different times at 0.1 C. d) Cycling performance of samples calcinated at 850 °C for different times at 0.5 C.

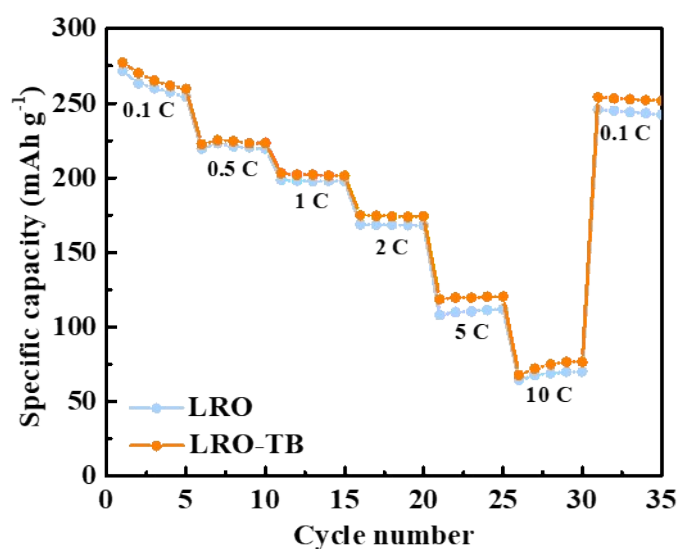

Figure S10. Rate capability of LRO-TB and LRO

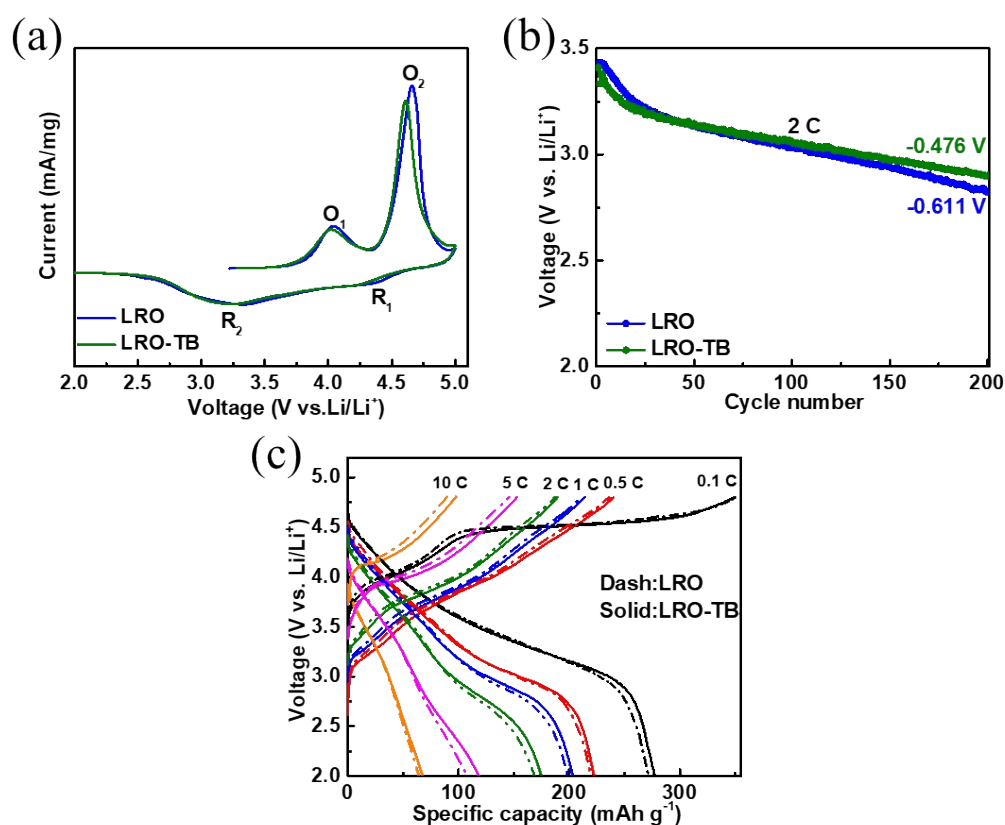

Figure S11. Electrochemical performances. a) Initial CV profiles obtained at 0.1 mV s<sup>-1</sup>. b) Voltage decay curves at 2 C. c) The corresponding charge-discharge profiles at different rates from 0.1 C to 10 C.

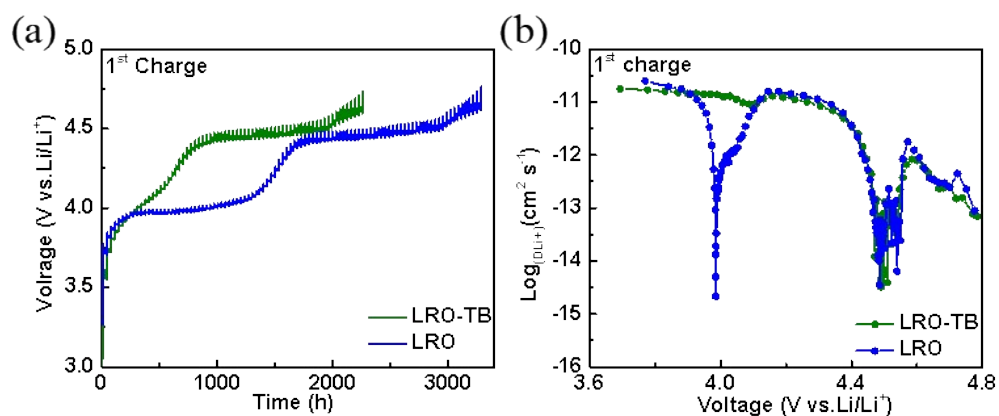

**Figure S12.** Li ion diffusion kinetics of LRO-TB and LRO. a) GITT curves of first charging process. b) Li-ion diffusion coefficient.

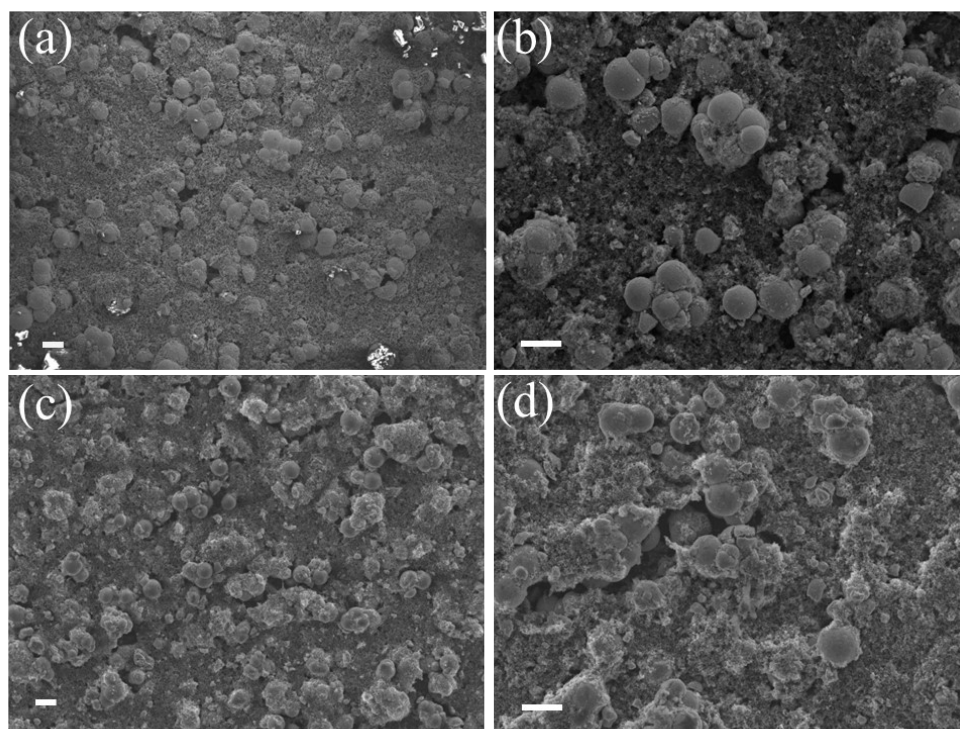

**Figure S13.** SEM images. Before cycling a) LRO-TB, c) LRO, scale bar, 10 µm. After 100 cycles at 0.5 C b) LRO-TB, d) LRO, scale bar, 10 µm.

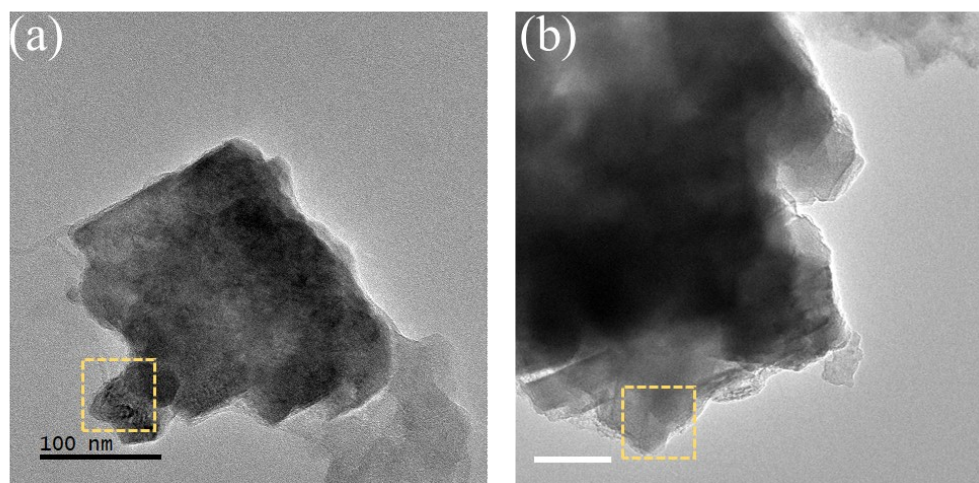

**Figure S14.** Ex-situ TEM images after 200 cycles at 2 C. a) LRO-TB. b) LRO, scale bar, 100 nm.

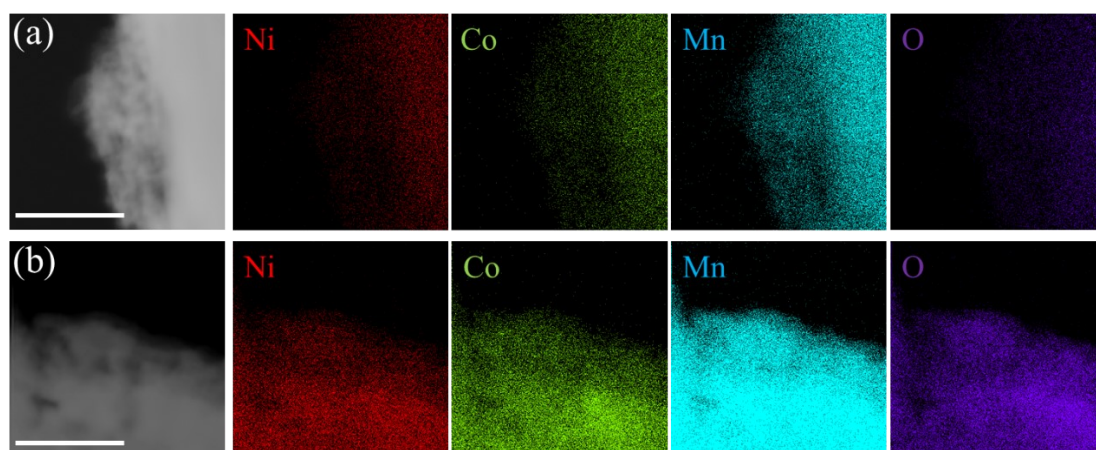

**Figure S15.** Elemental mapping after 200 cycles at 2 C. a) LRO-TB. b) LRO, scale bar, 500 nm.



**Table S1.** Crystal structure parameters obtained by XRD refinement.

| Material | $I_{(003)}/I_{(104)}$ | R-3m      |            |       |                     | Li <sup>+</sup> /Ni <sup>2+</sup><br>(%) |
|----------|-----------------------|-----------|------------|-------|---------------------|------------------------------------------|
|          |                       | a (Å)     | c (Å)      | c/a   | V (Å <sup>3</sup> ) |                                          |
| LRO-TB   | 1.297                 | 2.8525(0) | 14.2346(0) | 4.990 | 100.307             | 1.89                                     |
| LRO      | 1.346                 | 2.8490(8) | 14.2202(2) | 4.991 | 99.965              | 0.88                                     |

**Table S2.** Rietveld Refinement Results of atoms occupancy of LRO-TB.

|      | Atom | Site | x      | y      | z      | Occ    |
|------|------|------|--------|--------|--------|--------|
|      | Mn   | 4g   | 0.0000 | 0.1665 | 0.0000 | 1.0000 |
| R-3m | Li1  | 2b   | 0.0000 | 0.5000 | 0.0000 | 1.0000 |
|      | Li2  | 2c   | 0.0000 | 0.0000 | 0.5000 | 1.0000 |
|      | Li3  | 4h   | 0.0000 | 0.7361 | 0.5000 | 1.0000 |
|      | O1   | 4i   | 0.2275 | 0.0000 | 0.2154 | 1.0000 |
|      | O2   | 8j   | 0.2157 | 0.3224 | 0.2162 | 1.0000 |
|      | O    | 6c   | 0.0000 | 0.0000 | 0.2572 | 1.0000 |
| C/2m | Li1  | 3a   | 0.0000 | 0.0000 | 0.0000 | 0.9811 |
|      | Li2  | 3b   | 0.0000 | 0.0000 | 0.5000 | 0.0189 |
|      | Ni1  | 3b   | 0.0000 | 0.0000 | 0.5000 | 0.9811 |
|      | Ni2  | 3a   | 0.0000 | 0.0000 | 0.0000 | 0.0189 |

**Table S3.** Rietveld Refinement Results of atoms occupancy of LRO.

|      | Atom | Site | x      | y      | z      | Occ    |
|------|------|------|--------|--------|--------|--------|
|      | Mn   | 4g   | 0.0000 | 0.1618 | 0.0000 | 1.0000 |
| R-3m | Li1  | 2b   | 0.0000 | 0.5000 | 0.0000 | 1.0000 |
|      | Li2  | 2c   | 0.0000 | 0.0000 | 0.5000 | 1.0000 |
|      | Li3  | 4h   | 0.0000 | 0.7385 | 0.5000 | 1.0000 |
|      | O1   | 4i   | 0.2071 | 0.0000 | 0.2113 | 1.0000 |
|      | O2   | 8j   | 0.2327 | 0.3174 | 0.1971 | 1.0000 |
|      | O    | 6c   | 0.0000 | 0.0000 | 0.2552 | 1.0000 |
| C/2m | Li1  | 3a   | 0.0000 | 0.0000 | 0.0000 | 0.9912 |
|      | Li2  | 3b   | 0.0000 | 0.0000 | 0.5000 | 0.0088 |
|      | Ni1  | 3b   | 0.0000 | 0.0000 | 0.5000 | 0.9912 |
|      | Ni2  | 3a   | 0.0000 | 0.0000 | 0.0000 | 0.0088 |

**Table S4.** Crystal parameters obtained by Rietveld refinement of HTS materials.

| Time<br>(s) | Content (%) |      | R-3m      |            |       |                     | Li <sup>+</sup> /Ni <sup>2+</sup><br>(%) |
|-------------|-------------|------|-----------|------------|-------|---------------------|------------------------------------------|
|             |             |      | a (Å)     | c (Å)      | c/a   | V (Å <sup>3</sup> ) |                                          |
|             | C/2m        | R-3m |           |            |       |                     |                                          |
| 5           | 64.8        | 35.2 | 2.8465(0) | 14.1815(0) | 4.991 | 99.965              | 4.89                                     |
| 10          | 59.4        | 40.6 | 2.8483(5) | 14.2225(1) | 4.993 | 99.930              | 3.45                                     |
| 25          | 57.6        | 42.4 | 2.8542(7) | 14.2589(3) | 4.996 | 100.602             | 2.53                                     |
| 45          | 52.2        | 47.8 | 2.8525(0) | 14.2346(0) | 4.990 | 100.307             | 1.89                                     |
